# Supplementary material
Source: Research Square preprint supplement (doi:10.21203/rs.3.rs-10032014/v1)
Supplement: Supplementary file 1 [file b00442442cf66b206f80d1b5.docx]

**Appendix**

**Table S1.** Follow-up simple effects analysis for the effect of gait Speed on RMSE within each combination of Temporal representation and Feature set.

| **Feature Set** | **Temporal**  **Representation** | **Speed** | **P Value**  **Partial Eta Squared** |
| --- | --- | --- | --- |
| **Full** | **Time Normalized** | **Low** | <0.001  0.9756 |
| **Mid** |
| **High** |
| **Real Time** | **Low** | <0.001  0.9753 |
| **Mid** |
| **High** |
| **Reduced** | **Time Normalized** | **Low** | <0.001  0.9725 |
| **Mid** |
| **High** |
| **Real Time** | **Low** | <0.001  0.9708 |
| **Mid** |
| **High** |

**Table S2.** Follow-up simple effects analysis for the effect of Feature set on RMSE within each combination of gait Speed and Temporal representation.

| **Speed** | **Temporal**  **Representation** | **Feature**  **Set** | **P Value**  **Partial Eta Squared** |
| --- | --- | --- | --- |
| **Low** | **Time Normalized** | **Full** | <0.001  0.8531 |
| **Reduced** |
| **Real Time** | **Full** | <0.001  0.8686 |
| **Reduced** |
| **Mid** | **Time Normalized** | **Full** | 0.003  0.6223 |
| **Reduced** |
| **Real Time** | **Full** | <0.001  0.7905 |
| **Reduced** |
| **High** | **Time Normalized** | **Full** | 0.707  0.0164 |
| **Reduced** |
| **Real Time** | **Full** | 0.748  0.0120 |
| **Reduced** |

**Table S3.** Follow-up simple effects analysis for the effect of Temporal representation on RMSE within each combination of gait Speed and Feature set.

| **Speed** | **Feature**  **Set** | **Temporal**  **Representation** | **P Value**  **Partial Eta Squared** |
| --- | --- | --- | --- |
| **Low** | **Full** | **Time Normalized** | 0.046  0.3719 |
| **Real Time** |
| **Reduced** | **Time Normalized** | 0.003  0.6219 |
| **Real Time** |
| **Mid** | **Full** | **Time Normalized** | <0.001  0.8700 |
| **Real Time** |
| **Reduced** | **Time Normalized** | 0.012  0.5197 |
| **Real Time** |
| **High** | **Full** | **Time Normalized** | 0.253  0.1418 |
| **Real Time** |
| **Reduced** | **Time Normalized** | <0.001  0.5405 |
| **Real Time** |
